# Supplementary material
Source: PubMed Central journal article supplement (PMC3122241)
Supplement: supp_M111.240242_jbc.M111.240242-1.pdf [file supp_M111.240242_jbc.M111.240242-1.pdf]

Figure S1

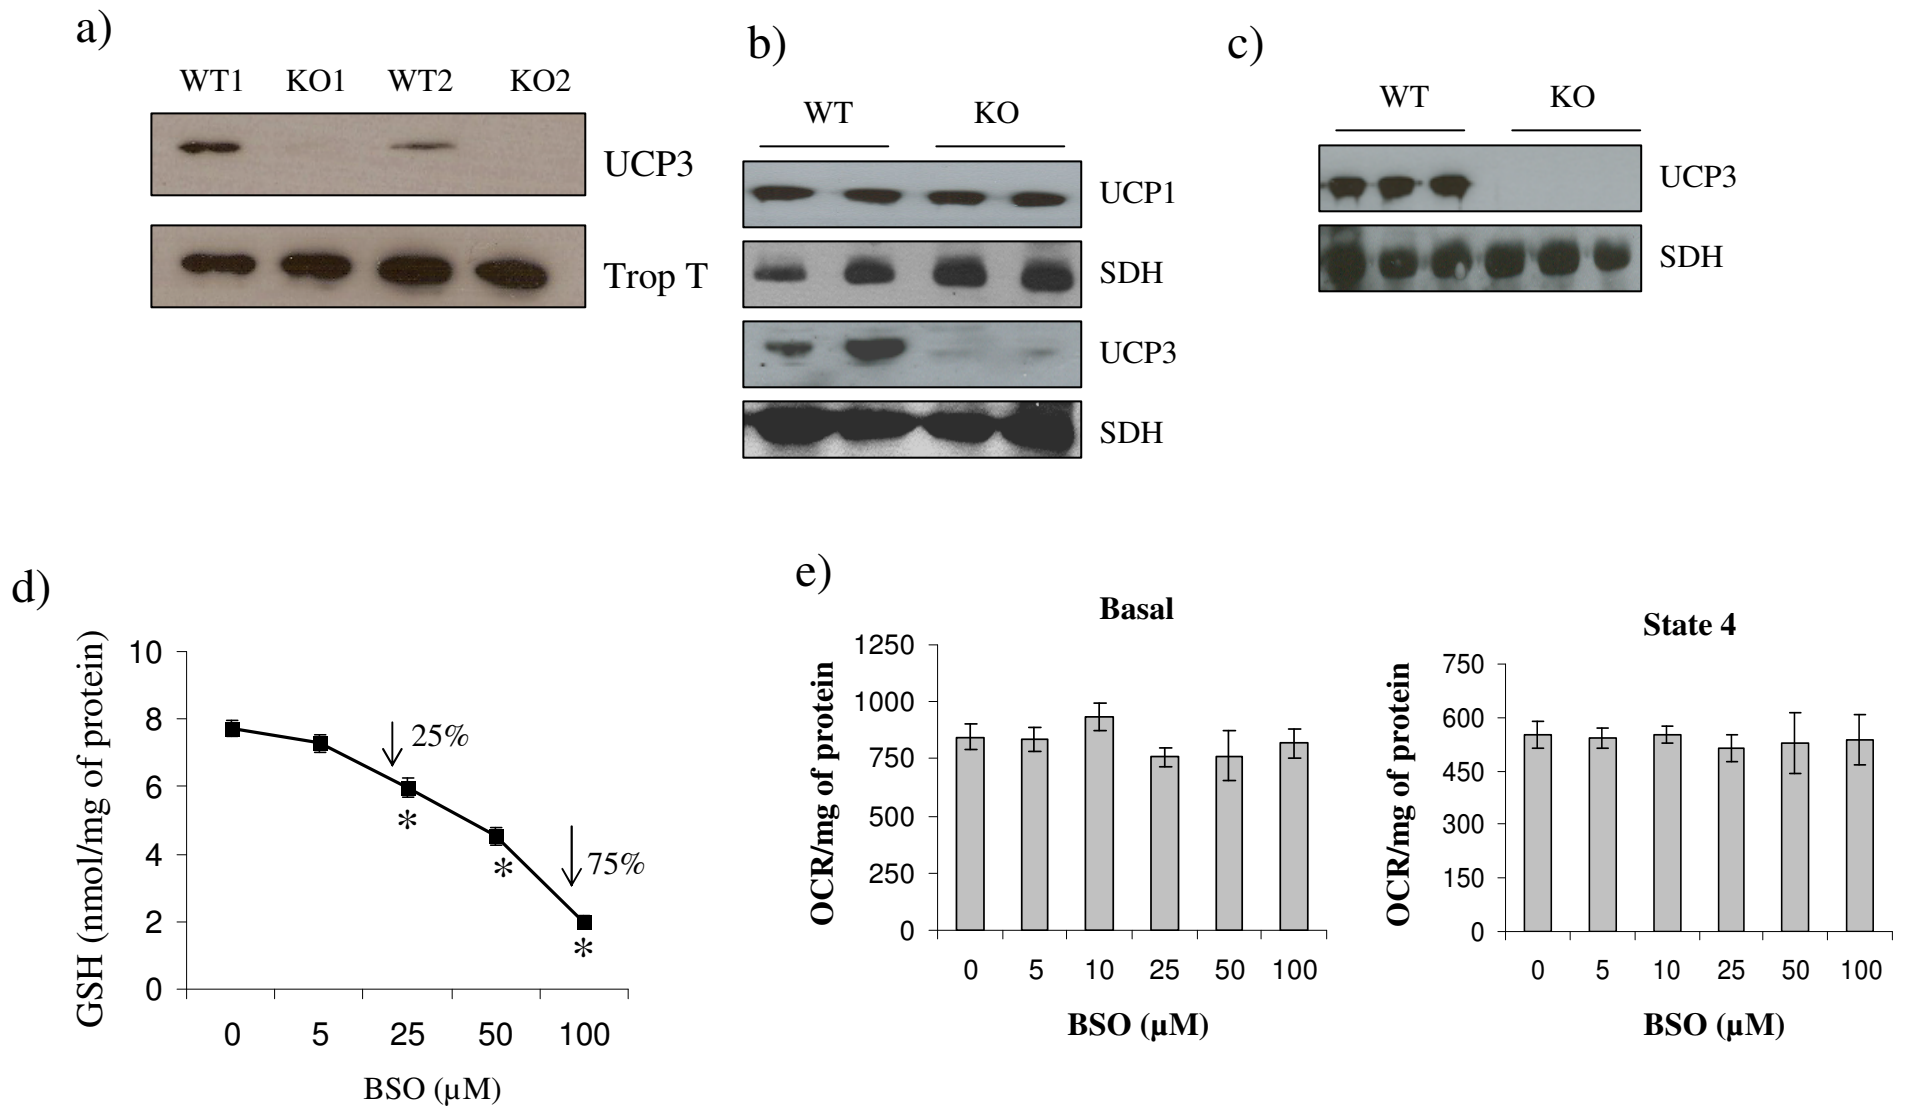

**Figure S1:** **a)** Immunodetection of UCP3 in primary myotubes from WT and UCP3 null (KO) mice. Troponin T (Trop T), a biomarker for muscle cell differentiation, was used as the loading control. Each lane represents samples collected from different cultures. **b)** Immunoblot analysis of UCP1 and UCP3 in BAT mitochondria isolated from WT and UCP3 null (KO) mice. 100µg of mitochondrial protein was used for the detection of UCP3. 10µg of mitochondrial protein was used for UCP1. SDH served as the loading control. Each lane represents a different mitochondrial sample isolated from different mice. **c)** Immunoblot analysis of UCP3 in skeletal muscle mitochondria isolated from WT and UCP3 null (KO) mice. SDH served as the loading control. Each lane represents a different mitochondrial sample isolated from different mice. UCP1, UCP3, troponin T, and SDH were detected using anti-UCP1, anti-UCP3, anti-troponin T, and anti-SDH antibodies. **d)** BSO depletes cellular GSH levels. WT primary myotubes were exposed to 0-100µM BSO for 24h and then the total cellular GSH levels were determined using a GSH detection kit. Estimation of cellular GSH was normalized to protein levels. n=4, \* p<0.05, 1-way ANOVA with a Tukey's post-hoc test. **e)** Impact of BSO on the mitochondrial bioenergetic parameters of WT primary myotubes. WT primary myotubes were exposed to different concentrations of BSO for 24h and then parameters were assessed in the Seahorse Extracellular Flux Analyzer. Following the determination of basal OCR, state 4 OCR was tested by treating cells with oligomycin (1µg/mL). n=3.
