# Supplementary material
Source: PubMed Central journal article supplement (PMC3122241)
Supplement: supp_M111.240242_jbc.M111.240242-2.pdf [file supp_M111.240242_jbc.M111.240242-2.pdf]

Figure S2

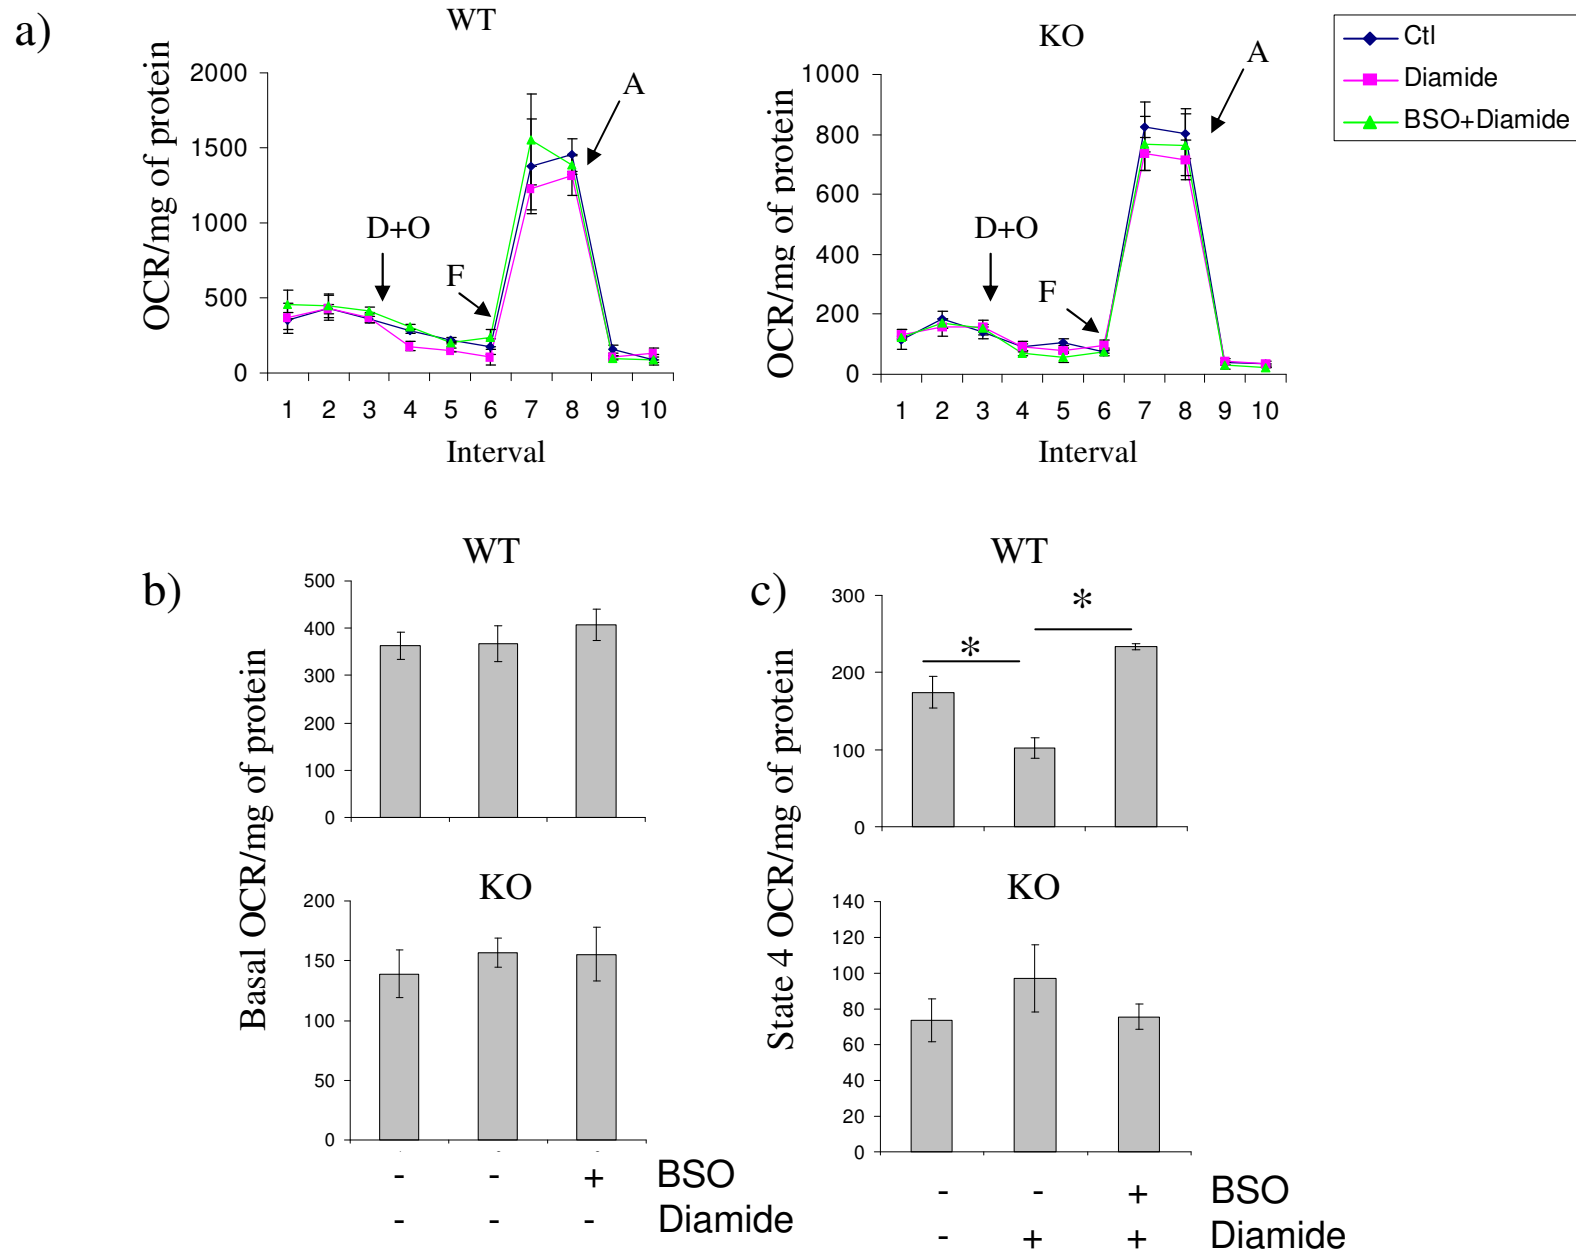

**Figure S2:** GSH-depleted cells are resistant to diamide-mediated inhibition of UCP3-dependent state 4 respiration. **a)** *In situ* determination of the mitochondrial metabolism in BSO-exposed WT and UCP3 null (KO) myotubes treated with or without diamide for 15min. Measurement of basal respiration was followed by treatment with diamide (D; 100 $\mu$ M) for 15min and then the injection of oligomycin (O; 1 $\mu$ g/mL), FCCP (F; 1 $\mu$ M), and antimycin A (A; 1 $\mu$ M), respectively. **b)** Basal respiration in WT or UCP3 null (KO) myotubes treated with or without BSO (25 $\mu$ M). n=4. **c)** State 4 respiration in WT or UCP3 null (KO) primary myotubes. Cells treated with or without BSO (25 $\mu$ M) were exposed to diamide (100 $\mu$ M) for 15min prior to the induction of state 4 respiration with oligomycin (1 $\mu$ g/ml). \* p<0.05, n=4, 1-way ANOVA with a Tukey's post-hoc test. \* corresponds to comparison with the cells treated with diamide only. Values in **b)** and **c)** are the basal and state 4 OCR averages from **a)**.
