# Supplementary material
Source: PubMed Central journal article supplement (PMC3122241)
Supplement: supp_M111.240242_jbc.M111.240242-3.pdf [file supp_M111.240242_jbc.M111.240242-3.pdf]

Figure S3

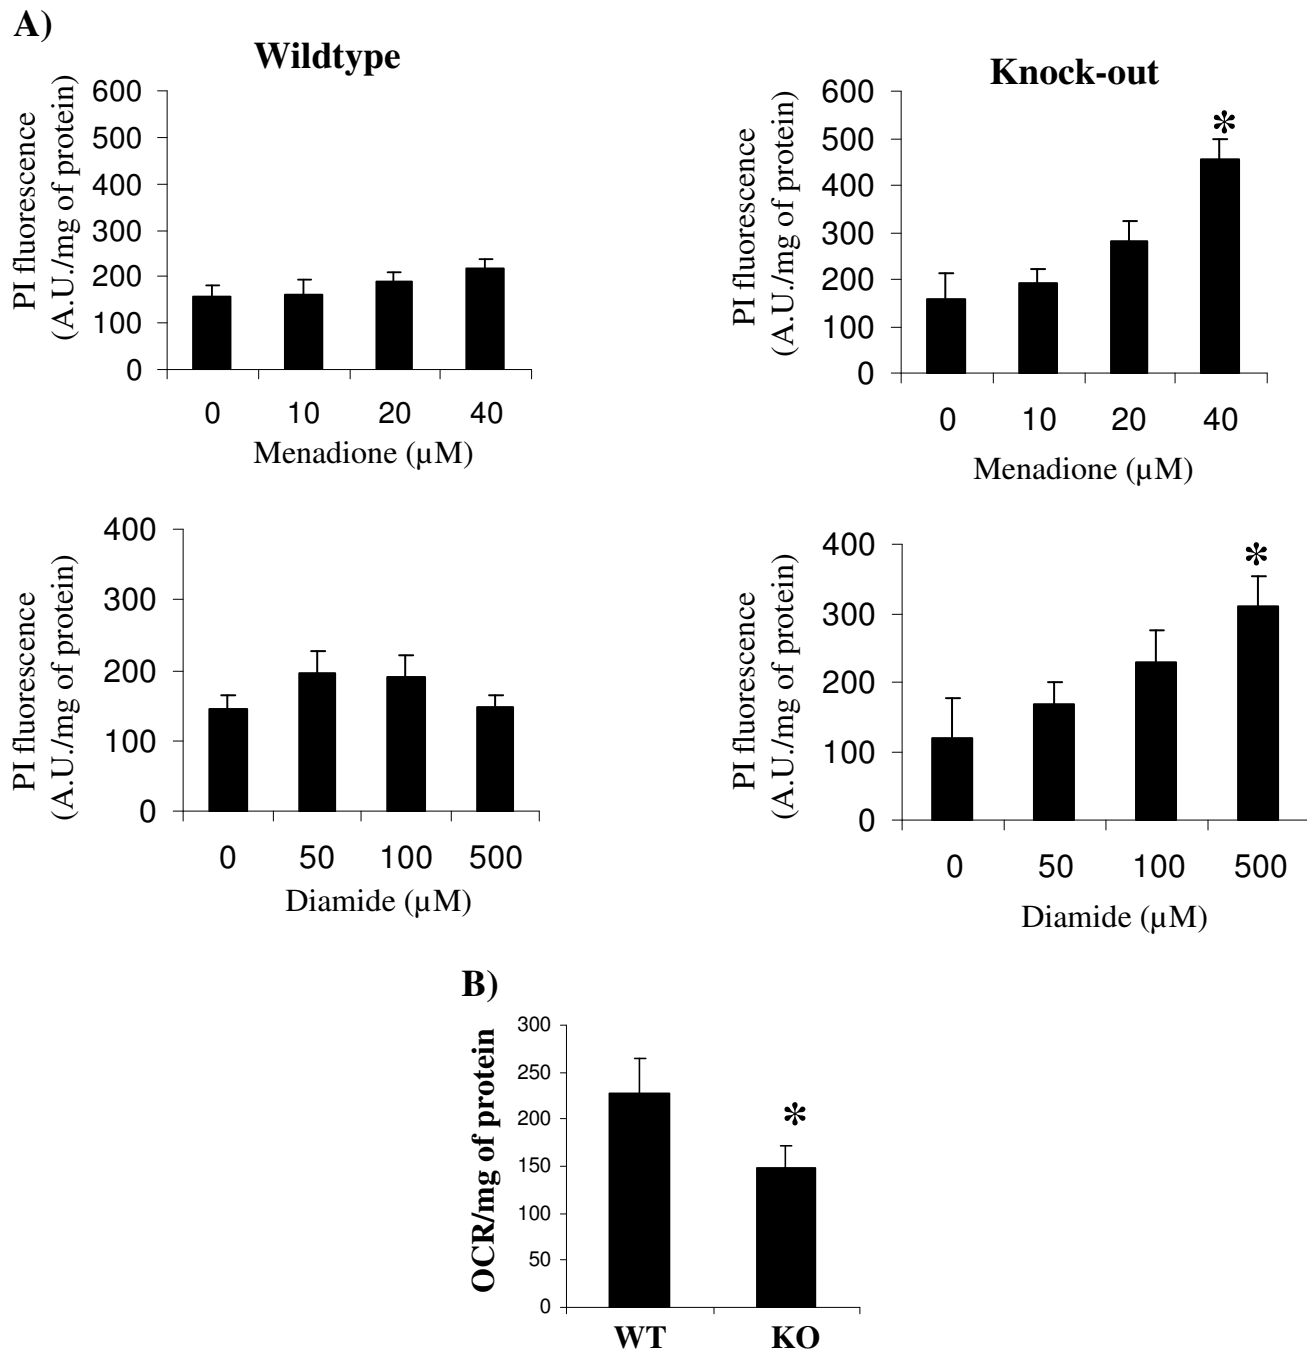

**Figure S3: a)** Analysis of the cytotoxicity of different doses of diamide and menadione in WT and UCP3KO primary myotubes.  $n=5$ ,  $p=0.05$ , 1-way ANOVA with a Tukey's post-hoc test. \* corresponds to comparison to the cells treated with  $0\mu\text{M}$  menadione or diamide. **b)** UCP3 is active in WT primary myotubes. State 4 OCR in WT and KO primary myotubes was measured *in situ* following treatment with oligomycin.  $n=5$ , \*  $p<0.05$ .
