# Supplementary material
Source: PubMed Central journal article supplement (PMC3122241)
Supplement: supp_M111.240242_jbc.M111.240242-4.pdf [file supp_M111.240242_jbc.M111.240242-4.pdf]

Figure S4

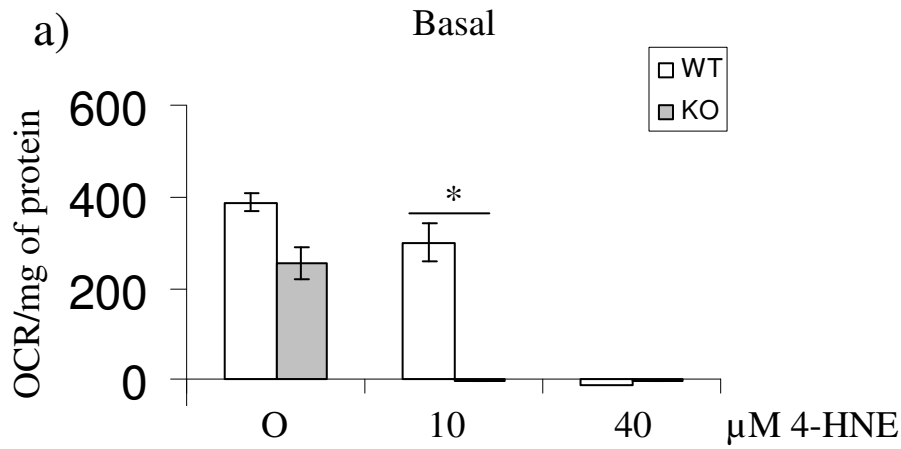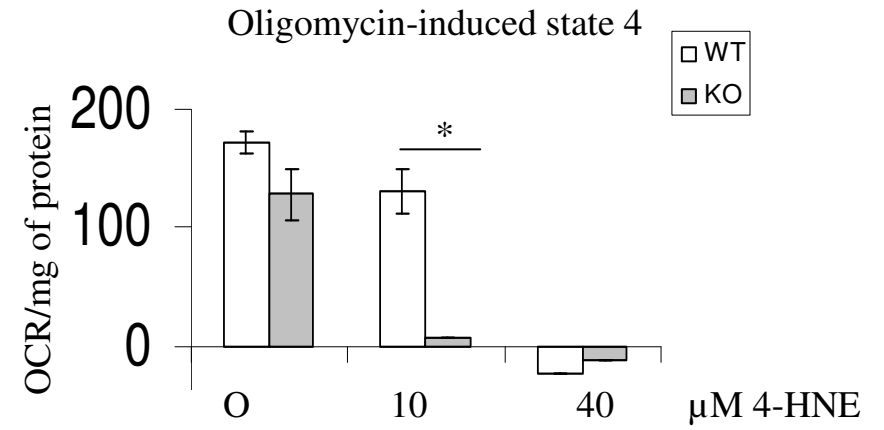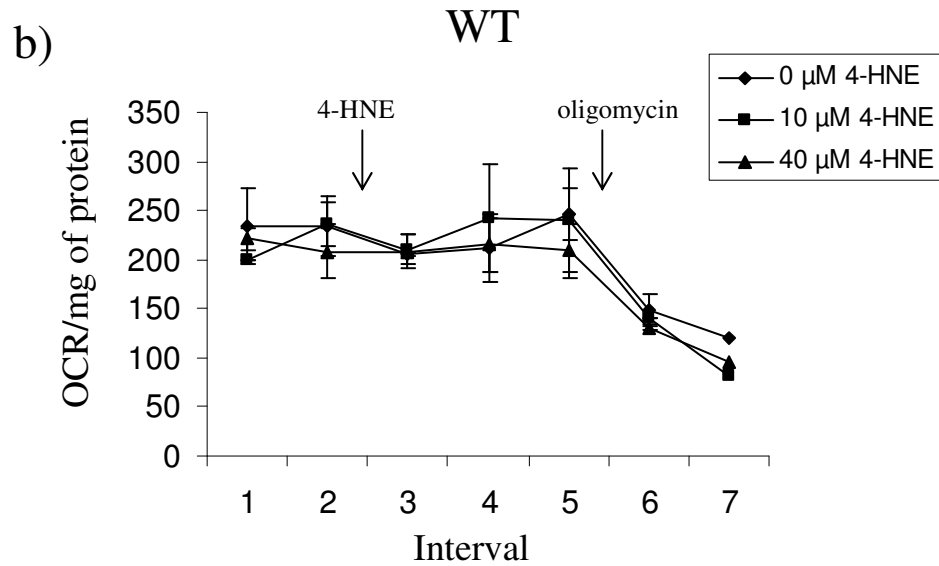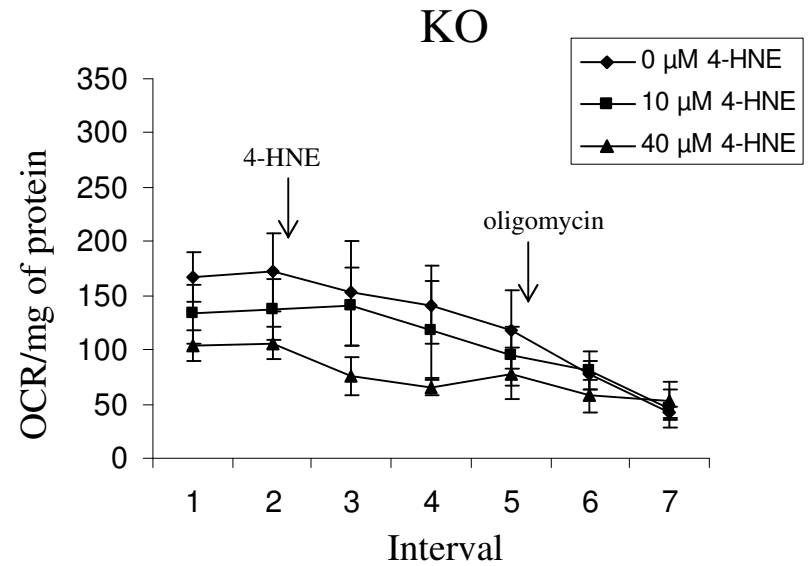

**Figure S4: a)** Chronic 4-HNE exposure does not increase state 4 respiration. Basal OCR in WT (white bar) and UCP3 null (grey bar) primary myotubes and oligomycin-induced state 4 OCR in WT (white bars) or UCP3 null (KO, grey bars) primary myotubes were determined following a 24h exposure to 0-40 $\mu$ M 4-HNE. n=3. **b)** Impact of acute 4-HNE exposure on basal and state 4 oxygen consumption. WT and UCP3 null (KO) myotubes were incubated in 0-40 $\mu$ M 4-HNE for 15min then the impact of 4-HNE on basal and oligomycin-induced state 4 respiration was assessed. n=3.
